# Supplementary material for: Murine AKAP7 Has a 2′,5′-Phosphodiesterase Domain That Can Complement an Inactive Murine Coronavirus ns2 Gene
Source: PubMed Central journal article supplement — mBio. 2014 Jul 1;5(4):e01312-14. doi: 10.1128/mBio.01312-14 (PMC4161237; doi:10.1128/mbio.01312-14), 2014-07-01
Supplement: mbo003141881sf02.pdf [file mbo003141881sf02.pdf]

Figure S2.

SCORE=81

\*

BAD AVG GOOD

\*

|                 |   |    |
|-----------------|---|----|
| Mus musculus    | : | 80 |
| Rattus norvegic | : | 84 |
| Homo sapiens    | : | 86 |
| Pan troglodytes | : | 85 |
| Macaca mulatta  | : | 86 |
| Nomascus leucoq | : | 86 |
| Callithrix jacc | : | 84 |
| Oryctolagus cun | : | 84 |
| Bos taurus      | : | 81 |
| Ovis aries      | : | 85 |
| Pantholops hodq | : | 76 |
| Orcinus orca    | : | 85 |
| Trichechus mana | : | 85 |
| Melopsittacus u | : | 78 |
| Gallus gallus   | : | 76 |
| Anolis caroline | : | 82 |
| Alligator missi | : | 72 |
| Danio rerio     | : | 73 |
| Ectocarpus sili | : | 77 |
| Zea mays        | : | 68 |
| cons            | : | 81 |

|                 |   |                                                                |    |
|-----------------|---|----------------------------------------------------------------|----|
| Mus musculus    | 1 | -----                                                          | 0  |
| Rattus norvegic | 1 | ME-----RP                                                      | 4  |
| Homo sapiens    | 1 | ME-----RP                                                      | 4  |
| Pan troglodytes | 1 | ME-----RP                                                      | 4  |
| Macaca mulatta  | 1 | ME-----RA                                                      | 4  |
| Nomascus leucog | 1 | ME-----RP                                                      | 4  |
| Callithrix jacc | 1 | ME-----RP                                                      | 4  |
| Oryctolagus cun | 1 | MR-----KP                                                      | 4  |
| Bos taurus      | 1 | -----                                                          | 0  |
| Ovis aries      | 1 | MW-----KP                                                      | 4  |
| Pantholops hodg | 1 | -----                                                          | 0  |
| Orcinus orca    | 1 | ME-----RA                                                      | 4  |
| Trichechus mana | 1 | ME-----RP                                                      | 4  |
| Melopsittacus u | 1 | MEE-----                                                       | 3  |
| Gallus gallus   | 1 | MQRV-----LRR-LLPA-----LCSAWPAALLAPRALLAPRASPMALRPAAAEA-----GGG | 46 |
| Anolis caroline | 1 | -----                                                          | 0  |
| Alligator missi | 1 | MALE-----R-----EEP                                             | 8  |
| Danio rerio     | 1 | MISRHFRLRAQPLVRLWRVNTDVPVVTECRKVNARVFCQSNQSKLLS-VPFN-MEDNINN   | 60 |
| Ectocarpus sili | 1 | MI-----SA                                                      | 4  |
| Zea mays        | 1 | ME-----GA                                                      | 4  |
| cons            | 1 | -----                                                          | 63 |

|                 |    |                                                             |     |
|-----------------|----|-------------------------------------------------------------|-----|
| Mus musculus    | 1  | -----                                                       | 0   |
| Rattus norvegic | 5  | AAGEIDANKCDH-----LSRGEEGTG-DLE-----TSPVG-SL                 | 35  |
| Homo sapiens    | 5  | EAGGINSNECEN-----VSRKKKMSE-EFE-----ANTMD-SL                 | 35  |
| Pan troglodytes | 5  | EAGGINSNECEN-----VSRKKKMSE-EFE-----ANTMD-SL                 | 35  |
| Macaca mulatta  | 5  | EAGGINSNECEN-----ESRKKKMSE-EFE-----ANTMD-SL                 | 35  |
| Nomascus leucog | 5  | EAGGVNSNECEN-----VSRKKKMSE-EFE-----ANTMD-SL                 | 35  |
| Callithrix jacc | 5  | GAGGINSNECEN-----VSRKKKI SE-EFE-----ASTMD-FL                | 35  |
| Oryctolagus cun | 5  | KRGGI NPSECEN-----MTRN-EMSE-ELE-----MDTVD-SL                | 34  |
| Bos taurus      | 1  | -----MSE-EFE-----ANTMD-FL                                   | 13  |
| Ovis aries      | 5  | KHGGLNSNECES-----VSSKEKMSE-EFE-----ANTMD-FL                 | 35  |
| Pantholops hodg | 1  | -----MSE-EFE-----ANTMD-FL                                   | 13  |
| Orcinus orca    | 5  | GAGGINSNECEN-----VSRKREMSE-ESE-----ANTVD-SL                 | 35  |
| Trichechus mana | 5  | GAGGINSSECEN-----VSREEKMSE-EFE-----ASTVD-SL                 | 35  |
| Melopsittacus u | 4  | -----P-----YPADSVDSL M                                      | 14  |
| Gallus gallus   | 47 | EKPSVATDSTPK-----HDGLENMQQ-EKKT V KGNKKRTQEGKKPCPPADSVDSL M | 96  |
| Anolis caroline | 1  | -----                                                       | 0   |
| Alligator missi | 9  | PSPPPSODELENMOKIQVI EKKKKMKQ-KRK-----THAAPKSIDSL M          | 51  |
| Danio rerio     | 61 | TTVCTTADKCTK-----QOKSKTLK-EKKA KGP KKASESK-----QKQSEEN-LL   | 106 |
| Ectocarpus sili | 5  | FVLYMA-----                                                 | 10  |
| Zea mays        | 5  | QGSSIVTKHNKROS-----PVQRWRPVSTEAVP-----QHHQD-DIETS N         | 44  |
| cons            | 64 | -----                                                       | 126 |



|                   |     |                                                                 |       |                    |     |
|-------------------|-----|-----------------------------------------------------------------|-------|--------------------|-----|
| Mus musculus      | 102 | LNEDE                                                           | ----- | VNIGTDALLELKPFFVEE | 123 |
| Rattus norvegicus | 141 | LNEDE                                                           | ----- | VNIGTDALLELKPFFVEE | 162 |
| Homo sapiens      | 136 | LNEDE                                                           | ----- | VNIGIDALLELKPFFIEE | 157 |
| Pan troglodytes   | 136 | LNEDE                                                           | ----- | VNIGIDALLELKPFFIEE | 157 |
| Macaca mulatta    | 136 | LNEDE                                                           | ----- | VNIGIDALLELKPFFIEE | 157 |
| Nomascus leucog   | 136 | LNEDE                                                           | ----- | INTGIDALLELKPFFIEE | 157 |
| Callithrix jacc   | 136 | LNEDE                                                           | ----- | VNIGTDALLELKPFFIEE | 157 |
| Oryctolagus cun   | 135 | LNEDE                                                           | ----- | INIGIDALLELKLPIEE  | 156 |
| Bos taurus        | 114 | LNEDD                                                           | ----- | VNVGIDALLELKPFFVEE | 135 |
| Ovis aries        | 136 | LNEDD                                                           | ----- | VNIGVDALLELKPFFVEE | 157 |
| Pantholops hodg   | 114 | LNEDD                                                           | ----- | VNIGIDALLELKPFFVEE | 135 |
| Orcinus orca      | 136 | LNEDE                                                           | ----- | INIGIDALLELKPFFVEE | 157 |
| Trichechus mana   | 136 | LNEDE                                                           | ----- | VNTGIDALLELKPFFIEE | 157 |
| Melopsittacus u   | 117 | SNKEE                                                           | ----- | ISIAVGALSDSKDFIED  | 138 |
| Gallus gallus     | 199 | SSKEE                                                           | ----- | ISIAVGALSDSKDFVED  | 220 |
| Anolis caroline   | 103 | STAAA                                                           | ----- | IDNAVSAFLKSQGLIEE  | 124 |
| Alligator missi   | 142 | SSEEE                                                           | ----- | VGIAVGAFLESKDSIEE  | 163 |
| Danio rerio       | 200 | STQDQ                                                           | ----- | VDLAASTLSELESPLNA  | 221 |
| Ectocarpus_sili   | 93  | SEKDGSLQQARDTLEHCGDLLLEHGLSPEVDLQASASRAESVDDHMHPAALAI GDSNETAPG |       |                    | 155 |
| Zea_mays          | 219 | WNKER                                                           | ----- | IDKASDVLQSVSTQVNE  | 240 |

cons 316 : : : : : 378

|                   |     |                                                            |       |                                          |     |
|-------------------|-----|------------------------------------------------------------|-------|------------------------------------------|-----|
| Mus musculus      | 124 | I LEGKHLALPFQIGTFC                                         | ----- | GOVGFVKLADGDHVSALLEIAETAKRTFREKGILA      | 176 |
| Rattus norvegicus | 163 | I LEGKHLTLPPHIGTFC                                         | ----- | GOVGFVKLADGDHVSALLEIAETAKRTFQEKGILA      | 215 |
| Homo sapiens      | 158 | LLQ GKHLTLPPFQIGTFC                                        | ----- | NOVGFVKLAEGDHVNSLLEIAETANRTFQEKGILV      | 210 |
| Pan troglodytes   | 158 | LLQ GKHLTLPPFQIGTFC                                        | ----- | NOVGFVKLAEGDHVNSLLEIAETANRTFQEKGILV      | 210 |
| Macaca mulatta    | 158 | LLQ GKHLTLPPFQIGTFC                                        | ----- | NOVGFVKLAEGDHINSLLEIAETANRTFQEKGILA      | 210 |
| Nomascus leucog   | 158 | LLQ GKHLTLPPFQIGTFC                                        | ----- | NOVGFVKLAEGDHVNSLLEIAETANRTFQEKGILV      | 210 |
| Callithrix jacc   | 158 | LLQ GKHLTLPPFQIGTFC                                        | ----- | NOVGFVKLAEGDHVNSLSEIAETANRTFQEKGIRA      | 210 |
| Oryctolagus cun   | 157 | ILQ GKHLTLPPFQIGSFC                                        | ----- | DRVGFVKLAEGDHINLLEIAETAKRTFQEKGMV        | 209 |
| Bos taurus        | 136 | ILQ GKPLTLPPFEGVDTFC                                       | ----- | NOVGFVKLAEGDHINSLLEIADAARTFQEKGILA       | 188 |
| Ovis aries        | 158 | ILQ GKPLTLPPFEGVDTFC                                       | ----- | NOVGFVKLAEGGHINSLLEIADAARTFQEKGILA       | 210 |
| Pantholops hodg   | 136 | ILQ GKPLTLPPFEGVDTFC                                       | ----- | NOVGFVKLAEGDHINSLLEIADAARTFQEKGILA       | 188 |
| Orcinus orca      | 158 | ILQ GKHLTLPPFQGVNFR                                        | ----- | NOVGFVKLAEGDHINPLLEIAETAERTFOAKGILA      | 210 |
| Trichechus mana   | 158 | ILQ GKHLTLPPFQGVNFR                                        | ----- | NOVGFVKLAEGDHINPLLEIAETAERTFOAKGILA      | 210 |
| Melopsittacus u   | 139 | LLKGTVDLSFQGIHFFK                                          | ----- | NEVGFVKLAENDHTAILKEIAETMTRKI FQEKGILA    | 191 |
| Gallus gallus     | 221 | LLKGTVDLSFQGIHFFK                                          | ----- | NEVAFVQLAENDHTAALSEIAETMTRKI FQEKGILA    | 273 |
| Anolis caroline   | 125 | LLQ GKPLDLSFQGTDFR                                         | ----- | NOVGFVKLSESDNTTLLKIAEIVKNLFQEKGI I I     | 177 |
| Alligator missi   | 164 | LLQ GKOLDLSFQGIHFFK                                        | ----- | NVVGFKLAEGDCTAMLMEISETMTRKI FQEKGILA     | 216 |
| Danio rerio       | 222 | LLSGRRLVLPFCGIGHFR                                         | ----- | QEVYFVRIAGEHLNLTALAEASVVRKAFEEERGITS     | 274 |
| Ectocarpus_sili   | 156 | VAAASPLMLSFRLGHFR                                          | ----- | NKILFAKLVEDEQATRLRGLASSLHRRFSEAGLVEEAAGF | 213 |
| Zea_mays          | 241 | ALENRPISIQRLGLTCMKGFPAKARVVVVPVLEVGSEGRLAHACKVITDAFIKAGLVE | ----- |                                          | 298 |

cons 379 : : : : : \* \* \* : 441

|                   |     |                          |                                            |       |          |         |     |
|-------------------|-----|--------------------------|--------------------------------------------|-------|----------|---------|-----|
| Mus musculus      | 177 | -----G-----              | ESRTFKE HLT FMKLSKAPMLRK                   | ----- | KGVRKIEP | GLYEQFI | 214 |
| Rattus norvegicus | 216 | -----G-----              | ESRTFKE HLT FMKLSKAPMLWK                   | ----- | KGVRKIEP | GLYEQFI | 253 |
| Homo sapiens      | 211 | -----G-----              | ESRSFKE HLT FMKLSKSPWLK                    | ----- | NGVKKIDP | DLYEKFI | 248 |
| Pan troglodytes   | 211 | -----G-----              | ESRSFKE HLT FMKLSKSLWLRK                   | ----- | NGVKKIDP | DLYEKFI | 248 |
| Macaca mulatta    | 211 | -----G-----              | DSRSFKE HLT FMKLSKSPWLK                    | ----- | NGVKKIDP | DLYEKFI | 248 |
| Nomascus leucog   | 211 | -----G-----              | DSRSFKE HLT FMKLSKSPWLK                    | ----- | NGVKKIDP | DLYEKFI | 248 |
| Callithrix jacc   | 211 | -----G-----              | ESRSFKE HLT FMKLSKAPWLK                    | ----- | NGVKKIDP | DLYEKFI | 248 |
| Oryctolagus cun   | 210 | -----G-----              | ESQS FKE HLT FMKLSKSPWLHK                  | ----- | NGVKKIEP | ELYEKFI | 247 |
| Bos taurus        | 189 | -----G-----              | ESRTFKE HLT FMKLSRPLWLK                    | ----- | KGVKKIDP | KLYEKFI | 226 |
| Ovis aries        | 211 | -----G-----              | ESRTFKE HLT FMKLSRSPWLK                    | ----- | KGVKKIDP | KLYEKFI | 248 |
| Pantholops hodg   | 189 | -----G-----              | ESRTFKE HLT FMKLSKSPWLK                    | ----- | KGVKKIDP | KLYEKFI | 226 |
| Orcinus orca      | 211 | -----G-----              | ESRTFKE HLT FMKLSKAPWLK                    | ----- | KGVKKIDP | KEYEKFI | 248 |
| Trichechus mana   | 211 | -----G-----              | ESRSFKE HLT FMKLSKAPWLK                    | ----- | KGVKKIDP | ELYEKFI | 248 |
| Melopsittacus u   | 192 | -----G-----              | EERDFKE HLT FMKLSKSTPLRK                   | ----- | Q-VKKIDP | SLYEDFK | 228 |
| Gallus gallus     | 274 | -----G-----              | EERAFKE HLT FMKLSKSIQLRK                   | ----- | Q-VKKIDS | SLYEDYK | 310 |
| Anolis caroline   | 178 | -----G-----              | DDKAFKE HLT FMKLSKSPKLRK                   | ----- | QGVKKIDP | HLFENFK | 215 |
| Alligator missi   | 217 | -----G-----              | ENRAFKE HLT FMKLSKSPDLHK                   | ----- | Q-VKKIDL | NLYKNFK | 253 |
| Danio rerio       | 275 | -----A-----              | DDTAFKE HLT LLKLSRAPLRR                    | ----- | Q-----   |         | 298 |
| Ectocarpus_sili   | 214 | PSRKG EKRGDGDDGGGSGSGTSS | DSFEFTE HLT IMKTSKL                        | ---RD | RG-TLIPA | DSYDRYQ | 269 |
| Zea_mays          | 299 | -----ER-----             | DVRELKI HAT VMNVRHRKSRNKRNTWTSDFDARGIFGRFG |       |          |         | 340 |

cons 442 : : \* \* : : : 504

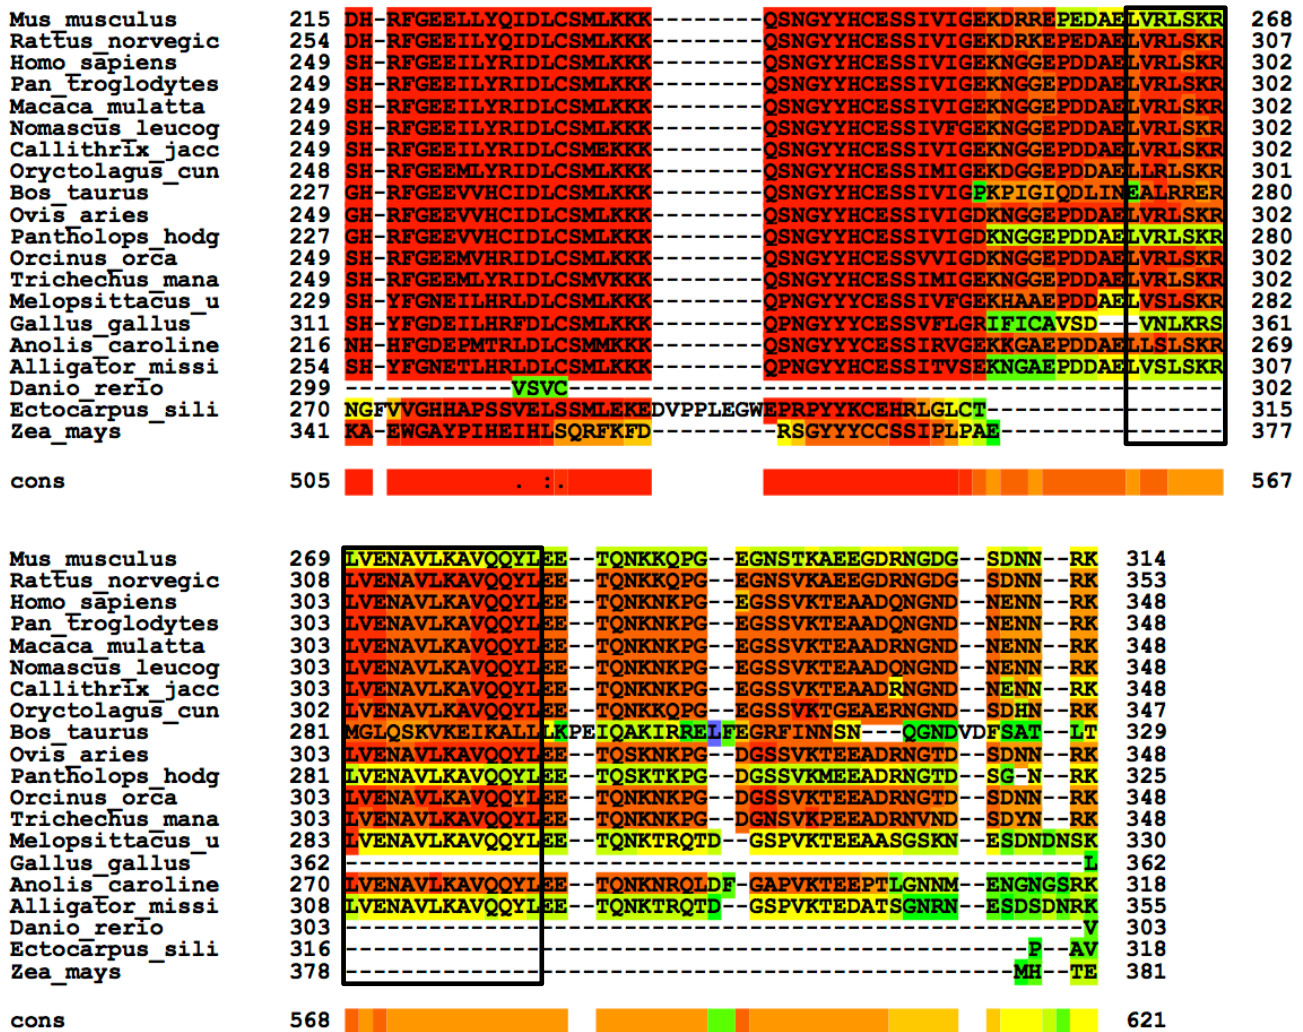

**Figure S2. Protein multiple sequence alignment (MSA) of mAKAP7 $\gamma$  and eukaryotic homologs.** MSA of *Mus musculus* (mouse), *Rattus norvegicus* (rat), *Homo sapiens* (human), *Pan troglodytes* (chimpanzee), *Macaca mulatta* (macaque), *Nomascus leucogenys* (gibbon), *Callithrix jacchus* (marmoset), *Oryctolagus cuniculus* (rabbit), *Bos taurus* (cow), *Ovis aries* (sheep), *Pantholops hodgsonii* (antelope), *Orcinus orca* (whale), *Trichechus manatus latirostris* (manatee), *Melopsittacus undulatus* (parakeet), *Gallus gallus* (chicken), *Anolis carolinensis* (lizard), *Alligator mississippiensis* (alligator), *Danio rerio* (zebra fish), *Ectocarpus siliculosus* (brown algae), *Zea mays* (corn). NCBI reference sequences NP\_061217.3, NP\_001001801.1, NP\_057461.2, XP\_518739.2, XP\_0011103953.2, XP\_003255757.1, XP\_002747004.1, XP\_002714864.1, NP\_001095736.1, XP\_004011367.1, XP\_005967580.1, XP\_004263875.1, XP\_004368981.1, XP\_005154795.1, XP\_004940279.1, XP\_003215759.1, XP\_006259840.1, XP\_005173856.1, CBN75660.1 and DAA52752.1, respectively. Alignment was performed with the T-Coffee Expresso, which incorporates known protein database structures to aid alignment, with all MSA options selected (pcma\_msa, mafft\_msa, clustalw\_msa, dialignx\_msa, poa\_msa, muscle\_msa, probcons\_msa, t\_coffee\_msa, amap\_msa, kalign\_msa, fsa\_msa, mus4\_msa) to ensure high confidence in the alignment (1-5). To convey confidence in the alignment, scores indicate the percent agreement between all MSA algorithms utilized in the analysis for each protein and for the consensus sequence. Additionally, color-coding indicates positional confidence of each aligned residue based on agreement between

MSA algorithms with blue indicating the least and red indicating the greatest confidence in the alignment. Conservation of sequence is indicated by Clustal MSA symbols in the consensus line (cons) with "\*" indicating fully conserved, ":" strong conservation of properties and "." weak conservation of properties. Boxes indicate predicted nuclear localization signals (blue) (6-8), catalytic HxT motifs (yellow) and PKA RII-binding domain (black) (9).

1. **Notredame C, Higgins DG, Heringa J.** 2000. T-Coffee: A novel method for fast and accurate multiple sequence alignment. *J Mol Biol* **302**:205-217.
2. **Poirot O, Suhre K, Abergel C, O'Toole E, Notredame C.** 2004. 3DCoffee@igs: a web server for combining sequences and structures into a multiple sequence alignment. *Nucleic Acids Res* **32**:W37-40.
3. **O'Sullivan O, Suhre K, Abergel C, Higgins DG, Notredame C.** 2004. 3DCoffee: combining protein sequences and structures within multiple sequence alignments. *J Mol Biol* **340**:385-395.
4. **Armougom F, Moretti S, Poirot O, Audic S, Dumas P, Schaeli B, Keduas V, Notredame C.** 2006. Espresso: automatic incorporation of structural information in multiple sequence alignments using 3D-Coffee. *Nucleic Acids Res* **34**:W604-608.
5. **Di Tommaso P, Moretti S, Xenarios I, Orobityg M, Montanyola A, Chang JM, Taly JF, Notredame C.** 2011. T-Coffee: a web server for the multiple sequence alignment of protein and RNA sequences using structural information and homology extension. *Nucleic Acids Res* **39**:W13-17.
6. **Kosugi S, Hasebe M, Entani T, Takayama S, Tomita M, Yanagawa H.** 2008. Design of peptide inhibitors for the importin alpha/beta nuclear import pathway by activity-based profiling. *Chem Biol* **15**:940-949.
7. **Kosugi S, Hasebe M, Tomita M, Yanagawa H.** 2009. Systematic identification of cell cycle-dependent yeast nucleocytoplasmic shuttling proteins by prediction of composite motifs. *Proc Natl Acad Sci U S A* **106**:10171-10176.
8. **Kosugi S, Hasebe M, Matsumura N, Takashima H, Miyamoto-Sato E, Tomita M, Yanagawa H.** 2009. Six classes of nuclear localization signals specific to different binding grooves of importin alpha. *J Biol Chem* **284**:478-485.
9. **Hou T, Li Y, Wang W.** 2011. Prediction of peptides binding to the PKA RIIalpha subunit using a hierarchical strategy. *Bioinformatics* **27**:1814-1821.
