# Supplementary material for: Murine AKAP7 Has a 2′,5′-Phosphodiesterase Domain That Can Complement an Inactive Murine Coronavirus ns2 Gene
Source: PubMed Central journal article supplement — mBio. 2014 Jul 1;5(4):e01312-14. doi: 10.1128/mBio.01312-14 (PMC4161237; doi:10.1128/mbio.01312-14), 2014-07-01
Supplement: mbo003141881sf03.pdf [file mbo003141881sf03.pdf]

Figure S3.

0.1

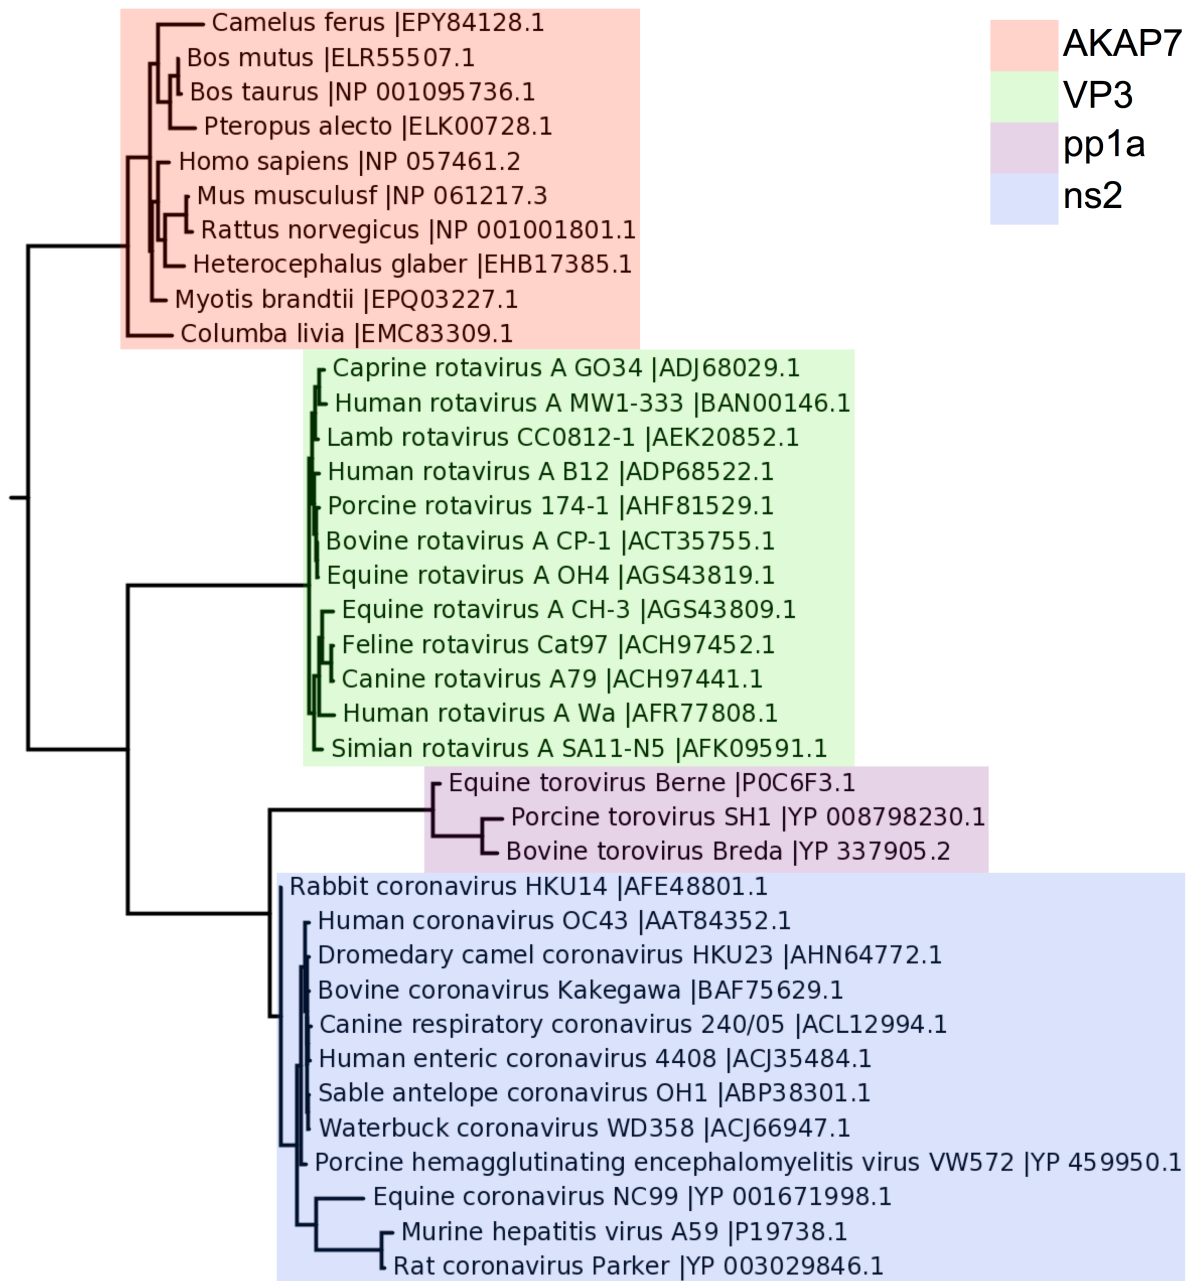

**Figure S3. Phylogenetic relationship between 2',5'-phosphodiesterases of distantly related taxa.** Protein sequences of Vertebrate AKAP7, rotavirus VP3, torovirus polyprotein 1a (pp1a) and coronavirus ns2 were analyzed by fast minimum evolution with a maximum sequence difference of 0.9 using the Grishin distance model. The tree is based on a COBALT alignment derived from a PSI Blast search with 3 iterations of Murine hepatitis virus strain A59 ns2 protein NCBI P19738.1.
